# Supplementary material
Source: publisher site journal article supplement (https://content.cld.iop.org/journals/1748-9326/8/3/034003/revision1/erl468389suppdata.pdf)
Supplement: Supplementary file 1 [file erl468389suppdata.pdf]

# Supplementary Materials for “Risks to coral reefs from ocean carbonate chemistry changes in recent earth system model projections”

K L Ricke, J C Orr, K Schneider, K Caldeira

**Figure S1. Percentage of coral reefs surrounded by open ocean waters above aragonite saturation thresholds as a function of time in three RCP scenarios for aragonite saturation thresholds ( $\Omega_{a,crit}$ ) of 3.5, 3.25 and 3. Panels show RCP emissions scenarios 8.5, 6.0, 4.5 and 2.6 with individual models displayed by the colors designated at top right.**

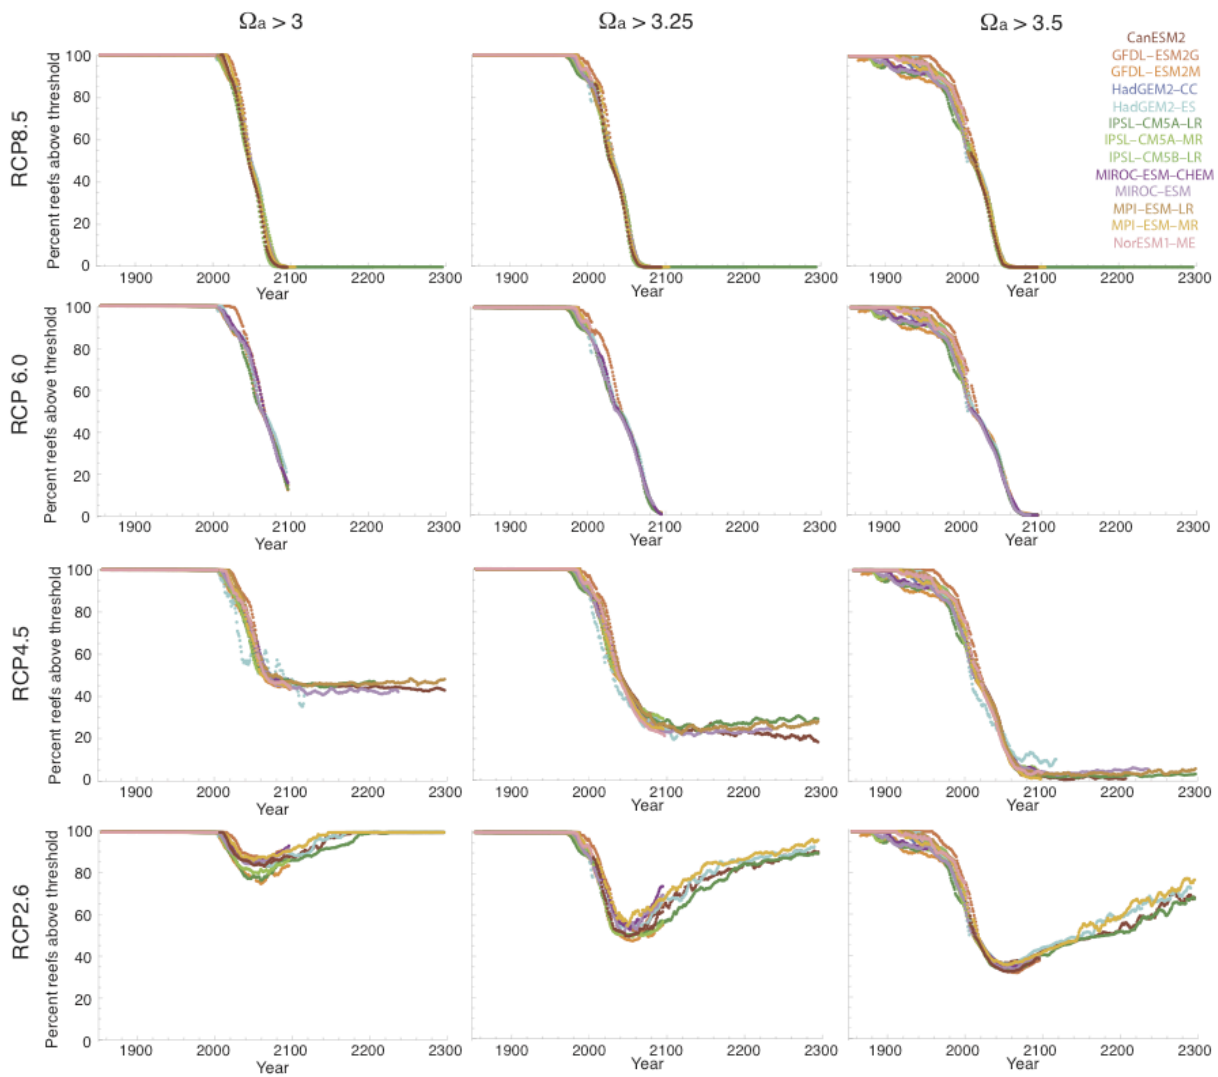

**Figure S2. Percentage of coral reefs surrounded by open ocean waters above aragonite saturation thresholds as a function of atmospheric CO<sub>2</sub> concentration displayed for aragonite saturation thresholds ( $\Omega_{a,crit}$ ) of 3.5, 3.25 and 3. The results for individual models are displayed by the colors designated at top right.**

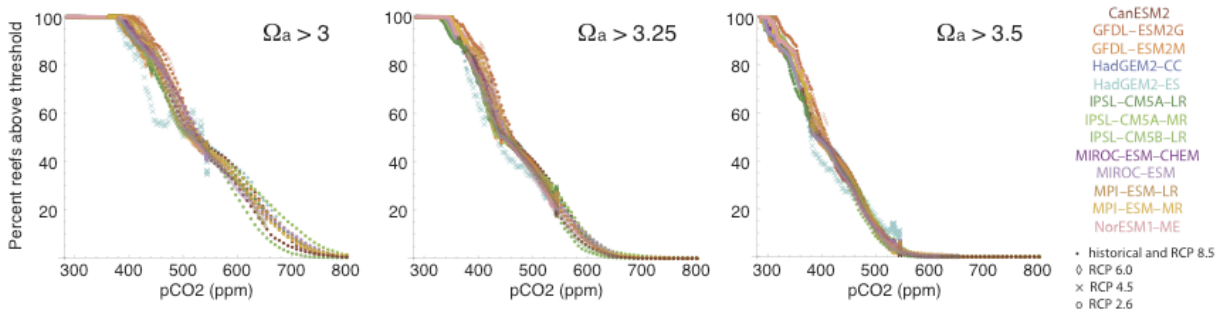

Table S1. Earth System Models included in the analysis and data available by scenario and year.

| <b>Modeling Group</b>                                                                                                                                                     | <b>Model Name</b> | <b>Historical</b> | <b>RCP 2.6</b> | <b>RCP 4.5</b> | <b>RCP 6.0</b> | <b>RCP 8.5</b> |
|---------------------------------------------------------------------------------------------------------------------------------------------------------------------------|-------------------|-------------------|----------------|----------------|----------------|----------------|
| Canadian Centre for Climate Modelling and Analysis                                                                                                                        | CanESM2           | 1850-2005         | 2006-2300      | 2006-2300      |                | 2006-2100      |
| NOAA Geophysical Fluid Dynamics Laboratory                                                                                                                                | GFDL-ESM2G        | 1861-2005         | 2006-2100      | 2006-2100      | 2006-2100      | 2006-2100      |
|                                                                                                                                                                           | GFDL-ESM2M        | 1861-2005         | 2006-2100      | 2006-2100      | 2006-2100      | 2006-2100      |
| Met Office Hadley Centre                                                                                                                                                  | HadGEM2-CC        | 1860-2004         |                | 2006-2098      |                |                |
|                                                                                                                                                                           | HadGEM2-ES        | 1860-2005         | 2006-2295      | 2006-2120*     | 2006-2098      | 2006-2207**    |
| Institut Pierre-Simon Laplace                                                                                                                                             | IPSL-CM5A-LR      | 1850-2005         | 2006-2300      | 2006-2300      | 2006-2100      | 2006-2300      |
|                                                                                                                                                                           | IPSL-CM5A-MR      | 1850-2005         | 2006-2100      | 2006-2100      |                | 2006-2100      |
|                                                                                                                                                                           | IPSL-CM5B-LR      | 1850-2005         |                |                |                | 2006-2100      |
| Japan Agency for Marine-Earth Science and Technology, Atmosphere and Ocean Research Institute (The University of Tokyo), and National Institute for Environmental Studies | MIROC-ESM         | 1850-1955         | 2006-2100      | 2006-2100      | 2006-2100      | 2006-2090      |
|                                                                                                                                                                           | MIROC-ESM-CHEM    | 1850-2005         | 2006-2100      | 2006-2240      | 2006-2090      | 2006-2100      |
| Max-Planck-Institut für Meteorologie                                                                                                                                      | MPI-ESM-LR        | 1850-1999         | 2006-2300      | 2006-2300      |                | 2006-2110      |
|                                                                                                                                                                           | MPI-ESM-MR        | 1850-2005         | 2006-2100      | 2006-2100      |                | 2006-2100      |
| Norwegian Climate Centre                                                                                                                                                  | NorESM1-ME        | 1850-2005         |                | 2006-2102      |                |                |

\* Missing Value Years: 2046

\*\* Missing Value Years: 2016, 2027, 2069, 2093, 2099, 2100
